# Supplementary material for: Mesoporous-rich calcium and potassium-activated carbons prepared from degreased spent coffee grounds for efficient removal of MnO42− in aqueous media
Source: Royal Society of Chemistry journal article supplement (doi:10.1039/d2ra02214a), 2022-01-01
Supplement: d2ra02214a1.pdf [file d2ra02214a1.pdf]

## Electronic Supplementary Information

### Mesoporous-rich Calcium and Potassium-Activated Carbons Prepared from Degreased Spent Coffee Grounds for Efficient Removal of $\text{MnO}_4^{2-}$ in Aqueous Media

Suranjana Bose,<sup>\*a</sup> Rebecca D. Kirk,<sup>a</sup> Harry Maslen,<sup>a</sup> Martha A. Pardo Islas,<sup>a</sup> Benedict Smith,<sup>a</sup> Thomas I. J. Dugmore,<sup>\*a</sup> and Avtar S. Matharu<sup>\*a</sup>

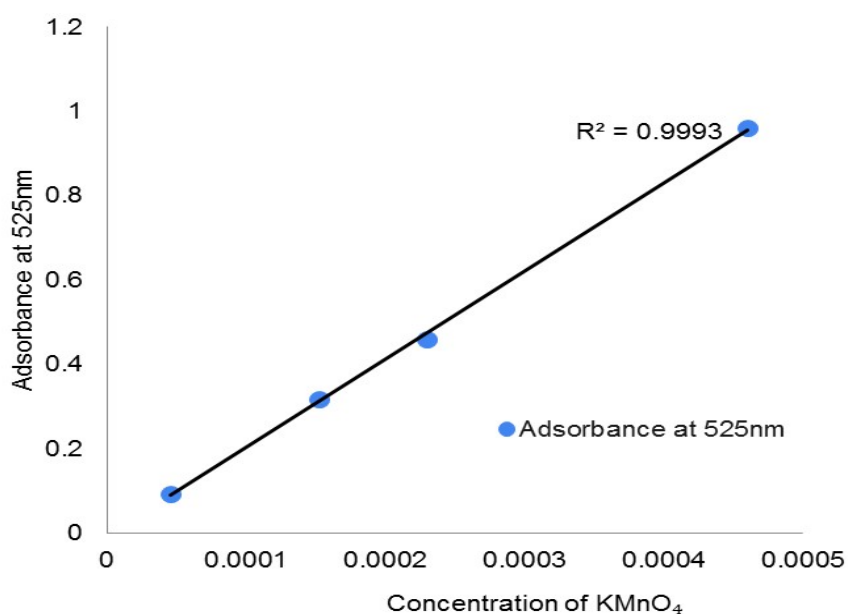

**Figure S1.** Calibration curve for the  $\text{KMnO}_4$  solution

**Table S1.** Chemical composition of SCG in g per 100g dry material analysed<sup>1</sup>

| Chemical Components | Composition (g/100g dry material) |
|---------------------|-----------------------------------|
| Cellulose           | 12.4                              |
| Hemicellulose       | 39.1                              |
| Lignin              | 23.9                              |
| Fat                 | 2.29                              |
| Ashes               | 1.30                              |
| Protein             | 17.4                              |
| Nitrogen            | 2.79                              |
| Total dietary fibre | 60.5                              |

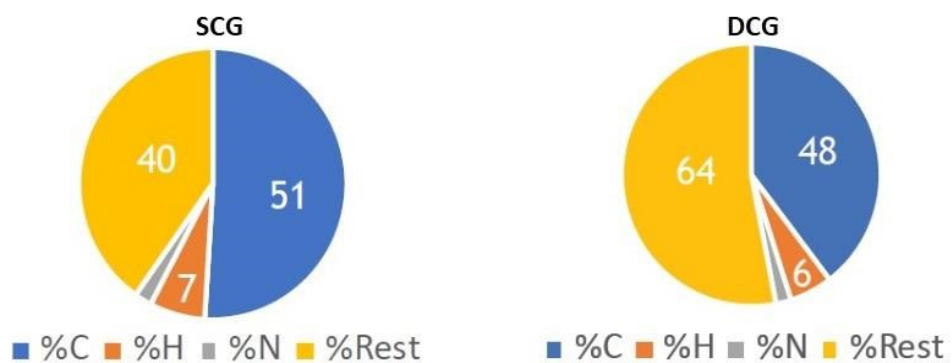

Figure S2. CHN analysis of SCG and DCG

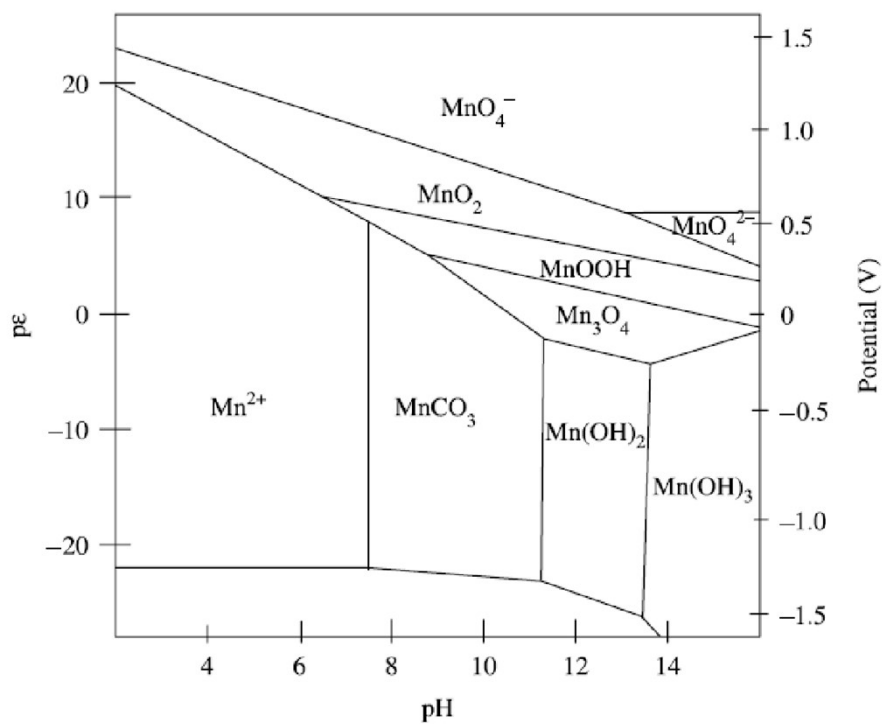

Figure S3. pe-pH diagram for aqueous Mn species<sup>2</sup>

Table S2 - The pH of solutions with and without the AC and KMnO<sub>4</sub> added

|                                                                  | pH at 20°C |
|------------------------------------------------------------------|------------|
| Water                                                            | 7.02       |
| 1:1CaCl <sub>2</sub> DCGAC + water                               | 6.37       |
| 0.00046M KMnO <sub>4</sub> solution                              | 5.75       |
| 0.00046M KMnO <sub>4</sub> solution + 1:1CaCl <sub>2</sub> DCGAC | 7.41       |

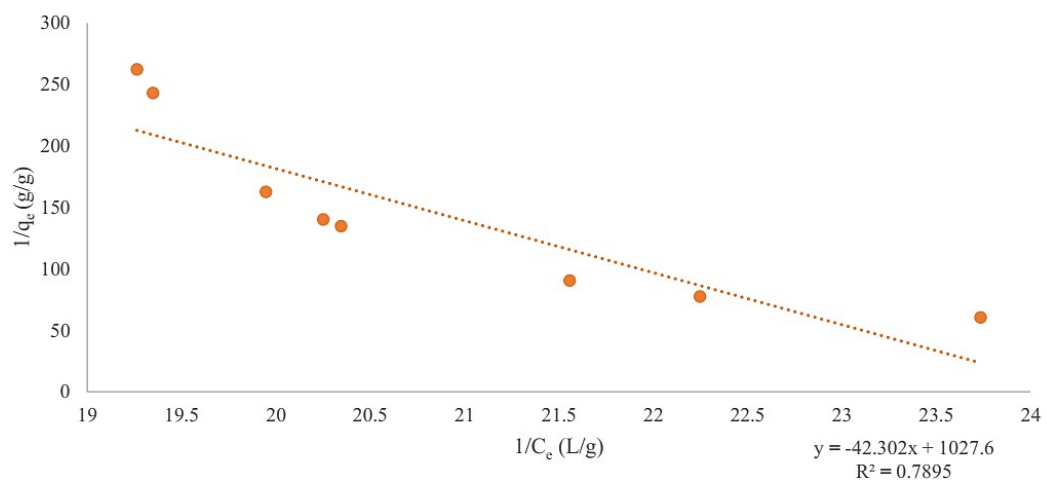

**Figure S4.** Langmuir modelling for 1:1 CaCl<sub>2</sub>DCGAC in 0.00046M KMnO<sub>4</sub> solution at room temperature.

## References

1. L. F. Ballesteros, J. A. Teixeira, S. I. Mussatto, *Food Bioprocess Technol*, 2014, **7**, 3493.
2. W. Stumm and J. J. Morgan, *Aquatic Chemistry, Chemical Equilibria and Rates in Natural Waters*, 3rd Edition, John Wiley & Sons, Inc., New York, 1996, 462.
